# Supplementary material for: Expressional dynamics of minisatellite 33.15 tagged spermatozoal transcriptome in Bubalus bubalis
Source: PubMed Central journal article supplement (PMC2713999; doi:10.1186/1471-2164-10-303), 2009-07-07
Supplement: 1471-2164-10-303-S1.pdf [file 1471-2164-10-303-S1.pdf]

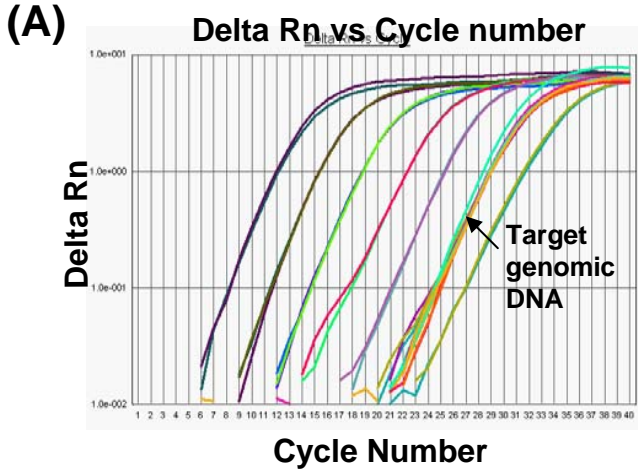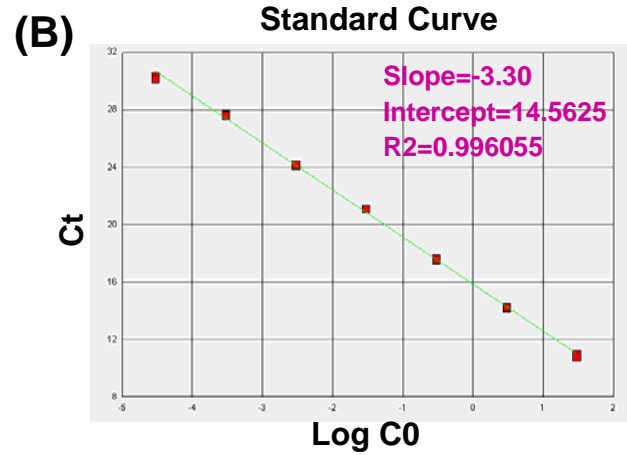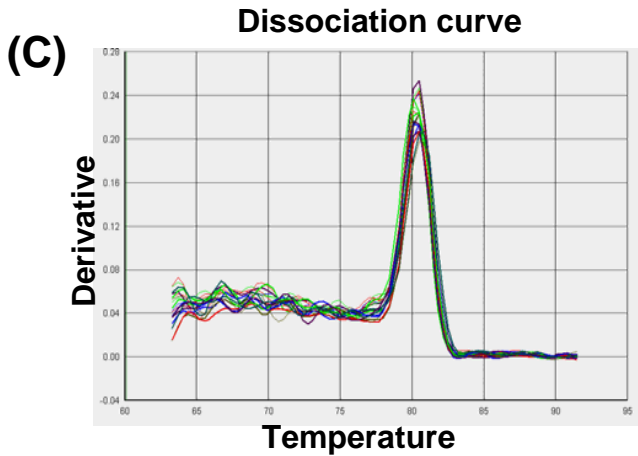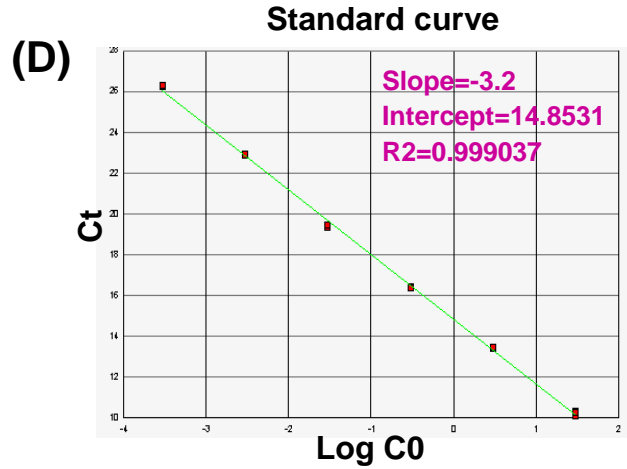

Additional file 1
