# Supplementary material for: Expressional dynamics of minisatellite 33.15 tagged spermatozoal transcriptome in Bubalus bubalis
Source: PubMed Central journal article supplement (PMC2713999; doi:10.1186/1471-2164-10-303), 2009-07-07
Supplement: 1471-2164-10-303-S2.pdf [file 1471-2164-10-303-S2.pdf]

**Additional File 2: List of primers used for the verification of any genomic or RNA contamination in sample.**

| Gene        | Accession numbers | Primer Sequence (5'-3')                                                       | Product size (bp) |           |
|-------------|-------------------|-------------------------------------------------------------------------------|-------------------|-----------|
|             |                   |                                                                               | cDNA              | gDNA      |
| <i>ACTB</i> | DQ661647          | Forward 5'CAGATCATGTTTCGAGACCTTCAA3'<br>Reverse 5'GATGATCTTGATCTTCATTGTGCTG3' | 630               | 720       |
| <i>PRM1</i> | NM_174156         | Forward 5'AGATACCGATGCTGCCTCAC3'<br>Reverse 5'GTGGCATGTTCAAGATGTGG3'          | 234               | 334       |
| <i>CD45</i> | AJ400864          | Forward GACATCGCAGTGTTTGTTC<br>Reverse GGAGGTTACATTCCTCTCG                    | 229               | Undefined |
| <i>CDH1</i> | NM_001002763      | Forward TCTACAGCATCACTGGCCAACGAGCTG<br>Reverse TGCTTGGACCATCAGGGTGTATGTGGG    | 476               | Undefined |

\*The primers for *ACTB* were designed by us, however, for *CD45* and *CDH1* genes were considered from Lalancette *et al.* These primers also spanned several introns but their positions were not defined.
