# Supplementary material for: Expressional dynamics of minisatellite 33.15 tagged spermatozoal transcriptome in Bubalus bubalis
Source: PubMed Central journal article supplement (PMC2713999; doi:10.1186/1471-2164-10-303), 2009-07-07
Supplement: 1471-2164-10-303-S4.pdf [file 1471-2164-10-303-S4.pdf]

## Additional file 4: Details of the Oligos used for RT-PCR, Copy number Calculation and Relative Expressional Studies

| S.N.                                                                                            | Oligo ID | Gene ID     | Sequence (5'-3')                | Annealing Temp. (in °C) |
|-------------------------------------------------------------------------------------------------|----------|-------------|---------------------------------|-------------------------|
| <b>A. Internal Primers Designed from the Identified Genes/Gene Fragments for RT-PCR studies</b> |          |             |                                 |                         |
| 1.                                                                                              | JSO1485  | pJSC39      | F 5' CTTAACCCGGCTTCAGCATCT 3'   | 59                      |
| 2.                                                                                              | JSO1486  |             | R 5'ACTCCTAGAAGTTGGTTCTGGTC3'   |                         |
| 3.                                                                                              | JSO1487  | pJSC40      | F 5'TGGAACAATAATGCCAATCTCAC3'   | 61                      |
| 4.                                                                                              | JSO1488  |             | R 5'GTTCCAGAAATCAATCAGCCATT3'   |                         |
| 5.                                                                                              | JSO1489  | pJSC41      | F 5'ACTTCACAGAGCTGATGGAAACA3'   | 60                      |
| 6.                                                                                              | JSO1490  |             | R 5'AGACGTCTCAATCCACATTCG3'     |                         |
| 7.                                                                                              | JSO1491  | pJSC42      | F 5'ACCTGAACCTGCTGTTTGAATTT3'   | 61                      |
| 8.                                                                                              | JSO1492  |             | R 5'ACACCAAGACTTTCTGCCTCTCT3'   |                         |
| 9.                                                                                              | JSO1493  | pJSC43      | F 5'CACGTTTCAGTTAAACATTTGTGGA3' | 61                      |
| 10.                                                                                             | JSO1494  |             | R 5'CATATCCAACCTTCTTTCTGTCT3'   |                         |
| 11.                                                                                             | JSO1495  | pJSC44      | F 5'TGTTTTCTCATTCACTCAGGTTCA3'  | 61                      |
| 12.                                                                                             | JSO1496  |             | R 5'ACATGTGGCCTTTGAATACTTCTC3'  |                         |
| 13.                                                                                             | JSO1497  | pJSC45      | F 5'CCAAAGTACTGGAGTTTCAGCTTC3'  | 60                      |
| 14.                                                                                             | JSO1498  |             | R 5'ATCCTAGCTCTGCTCATCTCATGT3'  |                         |
| 15.                                                                                             | JSO1499  | pJSC46      | F 5'GAAGTTGTGGAGAAAAGGGAACCTT3' | 61                      |
| 16.                                                                                             | JSO1500  |             | R 5'TAATGCCTTCAAGGTTTCATCCATA3' |                         |
| 17.                                                                                             | JSO1501  | pJSC47      | F 5'CTTTCTTCTTCTCATTACACCT3'    | 60                      |
| 18.                                                                                             | JSO1502  |             | R 5'ATCTTTCCAAGTCTGTATCCACCA3'  |                         |
| 19.                                                                                             | JSO1503  | pJSC48      | F 5'TGTCTGTGTTTTGCTTTTGAGAAA3'  | 59.5                    |
| 20.                                                                                             | JSO1504  |             | R 5'GCATCAGAGTCTTTTCCAATGAGT3'  |                         |
| 21.                                                                                             | JSO1505  | pJSC49      | F 5'ATGCAGAAACAGAGGAAAACAGTC3'  | 61.5                    |
| 22.                                                                                             | JSO1506  |             | R 5'TCACATCAGGTGACCAAAATACTG3'  |                         |
| 23.                                                                                             | JSO1507  | pJSC50      | F 5'AGGGGTGATGGAGGACTTAAAAT3'   | 60                      |
| 24.                                                                                             | JSO1508  |             | R 5'CACAAACACACTCAGGGTAGTTCC3'  |                         |
| 25.                                                                                             | JSO1509  | <i>ACTB</i> | F 5'CAGATCATGTTTCGAGACTTCAA3'   | 60                      |
| 26.                                                                                             | JSO1510  |             | R 5'GATGATCTTGATCTTCATTGTGCTG3' |                         |

### B. Real Time Primers for Copy Number Calculation and Relative Expressional Studies

|     |        |        |                                      |    |
|-----|--------|--------|--------------------------------------|----|
| 1.  | JSR760 | pJSC39 | F 5' ACAGGCGTAACCCAGGCTATAA 3'       | 60 |
| 2.  | JSR761 |        | R 5' GGGAGGCTTACCTGTTTTTGC 3'        |    |
| 3.  | JSR758 | pJSC40 | F 5' GACGGCTCAGGATTCTGCTT 3'         | 60 |
| 4.  | JSR759 |        | R 5' CTCCTGTCTCCCCTTTCC 3'           |    |
| 5.  | JSR756 | pJSC41 | F 5' CAATGCAGCCCGGTAAGG 3'           | 60 |
| 6.  | JSR757 |        | R 5' TTAATCCCCTCACCCATC 3'           |    |
| 7.  | JSR754 | pJSC42 | F 5' CAGAGAGAGGCAGAAAGTCTTGGT 3'     | 60 |
| 8.  | JSR755 |        | R 5' CCATCTTCACTGTGCTGCTAAAA 3'      |    |
| 9.  | JSR752 | pJSC43 | F 5' ACGTTCAGTTAAACATTTGTGGATCT 3'   | 60 |
| 10. | JSR753 |        | R 5' AGGACCTACTCCATTTTCAATCTTTAGT 3' |    |
| 11. | JSR738 | pJSC44 | F 5' CATGCTGAGCCAGAGGTC AA 3'        | 60 |
| 12. | JSR739 |        | R 5' AAGTCAAGAATCGACCAAGAGT 3'       |    |
| 13. | JSR740 | pJSC45 | F 5' GTGGGATCGGAGCTTATCGA 3'         | 60 |

---

|     |         |        |                                       |    |
|-----|---------|--------|---------------------------------------|----|
| 14. | JSR741  |        | R 5' GGTATCTGGAGTGAAAACAAACA 3'       |    |
| 15. | JSR742  | pJSC46 | F 5' CTCAAAATTAGTTCACTGTAGCATCATTT 3' | 60 |
| 16. | JSR743  |        | R 5' CAGATATTCTTTATCCATACACCACCAA 3'  |    |
| 17. | JSR746  | pJSC47 | F 5' AAGGCAGCAATGGTGGATACA 3'         | 60 |
| 18. | JSR747  |        | R 5' TCTTCAGGCACCCCTCCTAA 3'          |    |
| 19. | JSR750  | pJSC48 | F 5' AGATCAGCCCTGGGATTTCTTT 3'        | 60 |
| 20. | JSR751  |        | R 5' CGCATGAGGTGGCCAAA 3'             |    |
| 21. | JSR748  | pJSC49 | F 5' AGGCCCTTGGACAGCAAAG 3'           | 60 |
| 22. | JSR749  |        | R 5' TCATAGCATCAGTCATCCAATAATTA 3'    |    |
| 23. | JSR744  | pJSC50 | F 5' CTTTCTTGGTGTGTCCATGTTGA 3'       | 60 |
| 24. | JSR745  |        | R 5' GCCACAAACACACTCAGGGTAGT 3'       |    |
| 25. | JSR1386 | GAPDH  | F 5' GCAAGTTCCACGGCACAGT 3'           | 60 |
| 26. | JSR1387 |        | R 5' GATGGTGATGGCCTTTCCAT 3'          |    |

---
